# Supplementary material
Source: MDPI journal article supplement (https://www.mdpi.com/1424-8247/16/4/498)
Supplement: s1 [file s1]

# Biomarker quantification, spectroscopic, and molecular docking studies of the active compounds isolated from the edible plant *Sisymbrium irio* L.

Shaza M. Al-Massarani <sup>1</sup>, Latifah S. Aldurayhim <sup>1</sup>, Ibtisam A. Alotaibi <sup>1</sup>, Mostafa W. M. Abdelmageed <sup>1</sup>, Md Tabish Rehman <sup>1</sup>, Omer A. Basudan <sup>1</sup>, Maged S. Abdel-Kader <sup>2,3</sup>, Mohamed F. Alajmi <sup>1</sup>, Fatma M. Abdel Bar <sup>2,4</sup>, Perwez Alam<sup>1</sup>, Maram M. Al Tamimi <sup>1</sup> and Ali A. ElGamal <sup>1,4,\*</sup>

<sup>1</sup> Department of Pharmacognosy, College of Pharmacy, King Saud University, P.O. Box 2457, Riyadh 11451, Saudi Arabia

<sup>2</sup> Pharmacognosy Department, College of Pharmacy, Sattam Bin Abdulaziz University, Al-kharj 11942, Saudi Arabia

<sup>3</sup> Department of Pharmacognosy, College of Pharmacy, Alexandria University, Alexandria 21215, Egypt

<sup>4</sup> Pharmacognosy Department, Faculty of Pharmacy, Mansoura University, El Mansoura 35516, Egypt

\* Correspondence: E-mail address: aelgamel@ksu.edu.sa (Ali A. El-Gamal).

**Abstract:** Phytochemical investigation of the ethanolic extract of the aerial parts of *Sisymbrium irio* L. led to the isolation of four unsaturated fatty acids (**1-4**), including a new one (**4**), and four indole alkaloids (**5-8**). The structures of the isolated compounds were characterized with the help of spectroscopic techniques such as 1D, 2D NMR, mass spectroscopy and by correlation with the known compounds. In terms of their notable structural diversity, molecular docking approach with the AutoDock 4.2 program was used to analyze the interactions of the identified fatty acids with PPAR- $\gamma$  and the indole alkaloids with 5-HT<sub>1A</sub> and 5-HT<sub>2A</sub>, subtypes of serotonin receptor, respectively. Compared to the antidiabetic drug rivoglitazone, compound **3** acted as a potential PPAR- $\gamma$  agonist with binding energy -7.4 kcal mol<sup>-1</sup>. Moreover, compound **8** displayed the strongest affinity, with binding energies of -6.9 kcal/mol to 5HT<sub>1A</sub>, and -8.1 kcal/mol to 5HT<sub>2A</sub>, using serotonin and the antipsychotic drug risperidone as positive controls, respectively. The results of docked conformations represent an interesting target for developing novel antidiabetic and antipsychotic drugs and warrant further evaluation of these ligands in vitro and in vivo. On the other hand, an HPTLC method was developed to quantify  $\alpha$ -linolenic acid, in the hexane fraction of the ethanol extract of *S. irio*. The regression equation/correlation coefficient (r<sup>2</sup>) for linolenic acid was found as Y= 6.49X + 2310.8/ 0.9971 in the linearity range of 100-1200 ng/band. The content of  $\alpha$ -linolenic acid in *S. irio* aerial parts was found to be 28.67  $\mu$ g/mg of dried extract.

**Keywords:** *Sisymbrium irio*; unsaturated fatty acids; indole alkaloids; molecular docking; HPTLC standardization

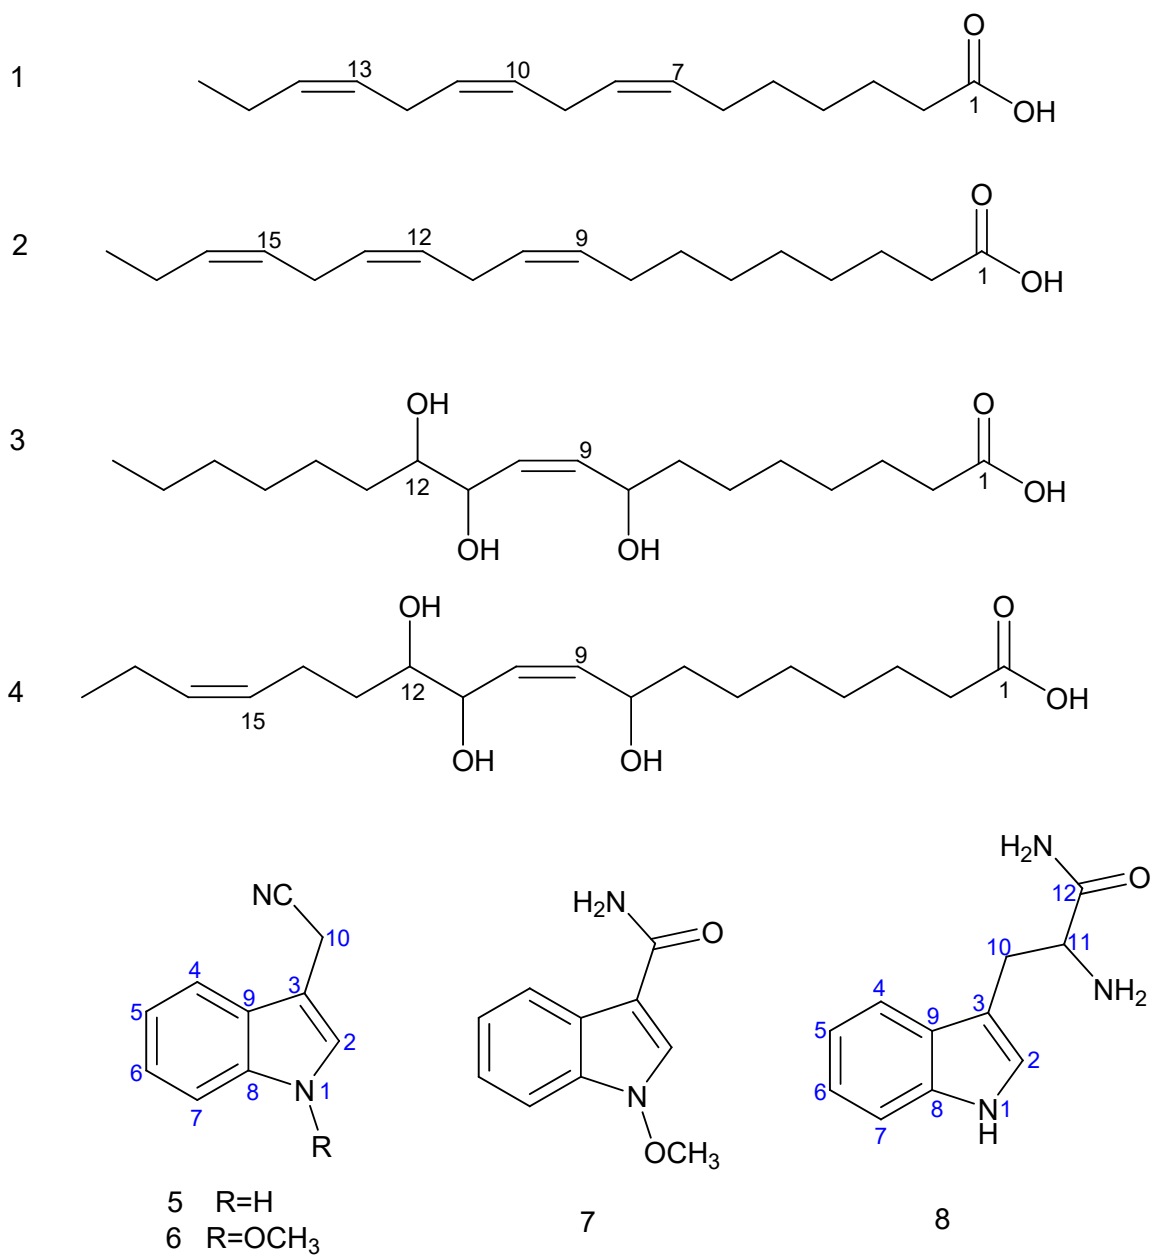

**Figure S1.** Chemical structures of the isolated compounds (**1-8**) from *Sisymbrium irio* L.

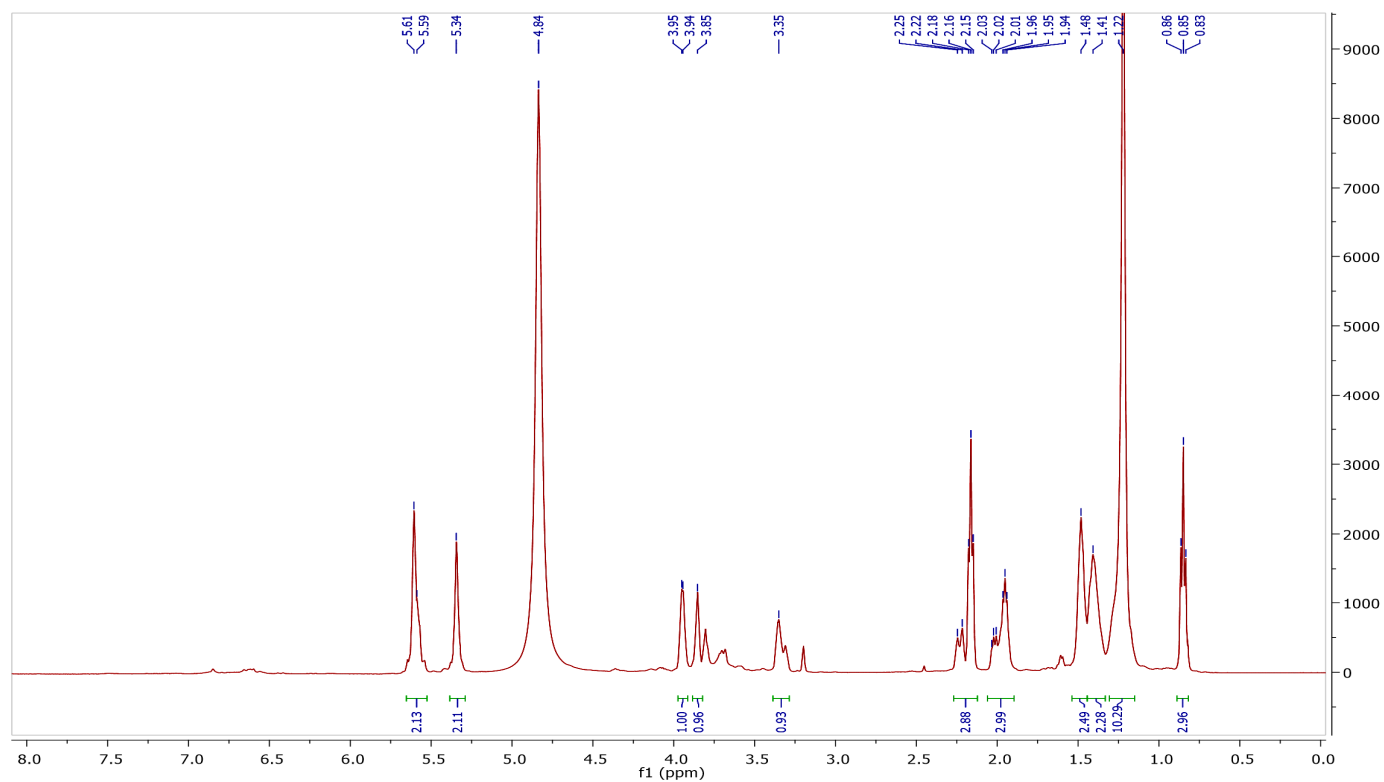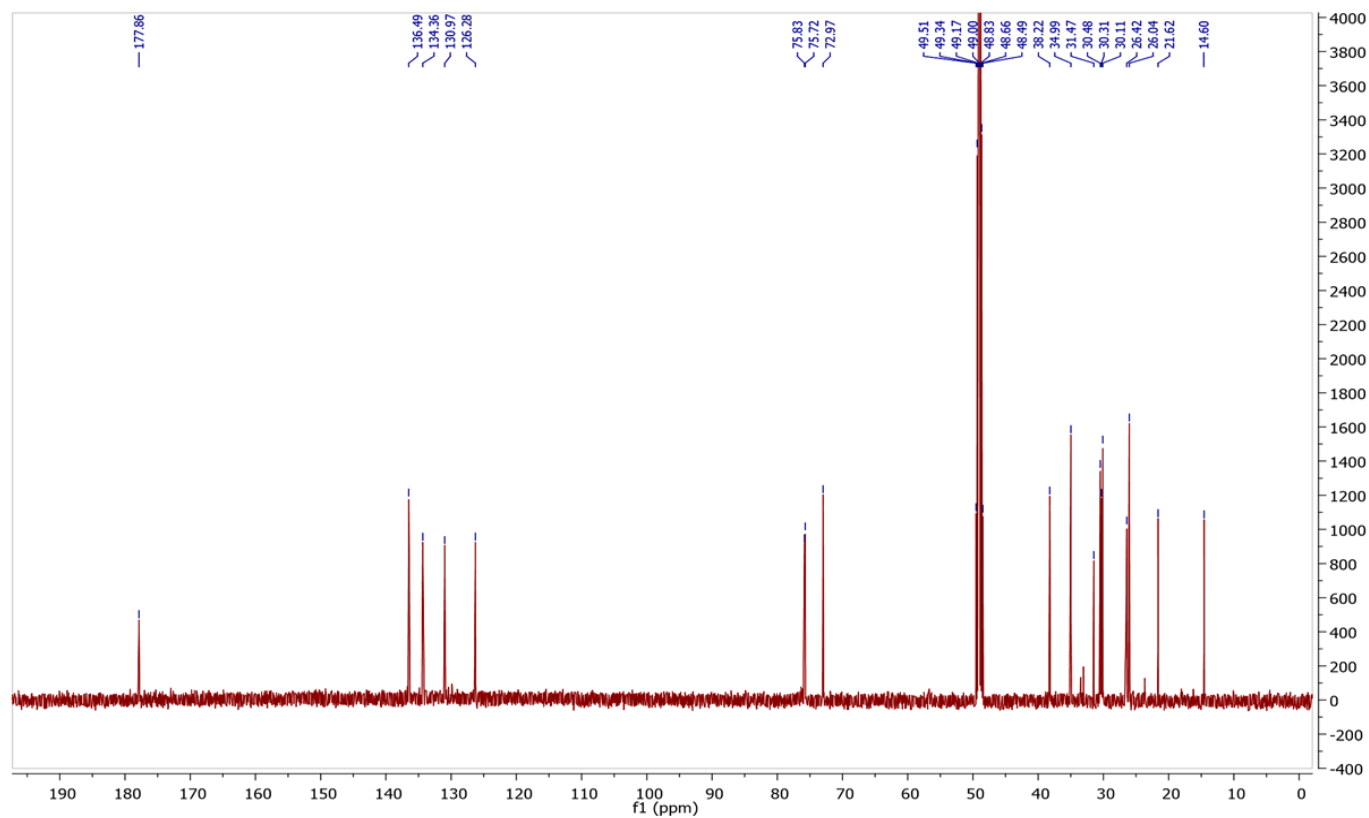

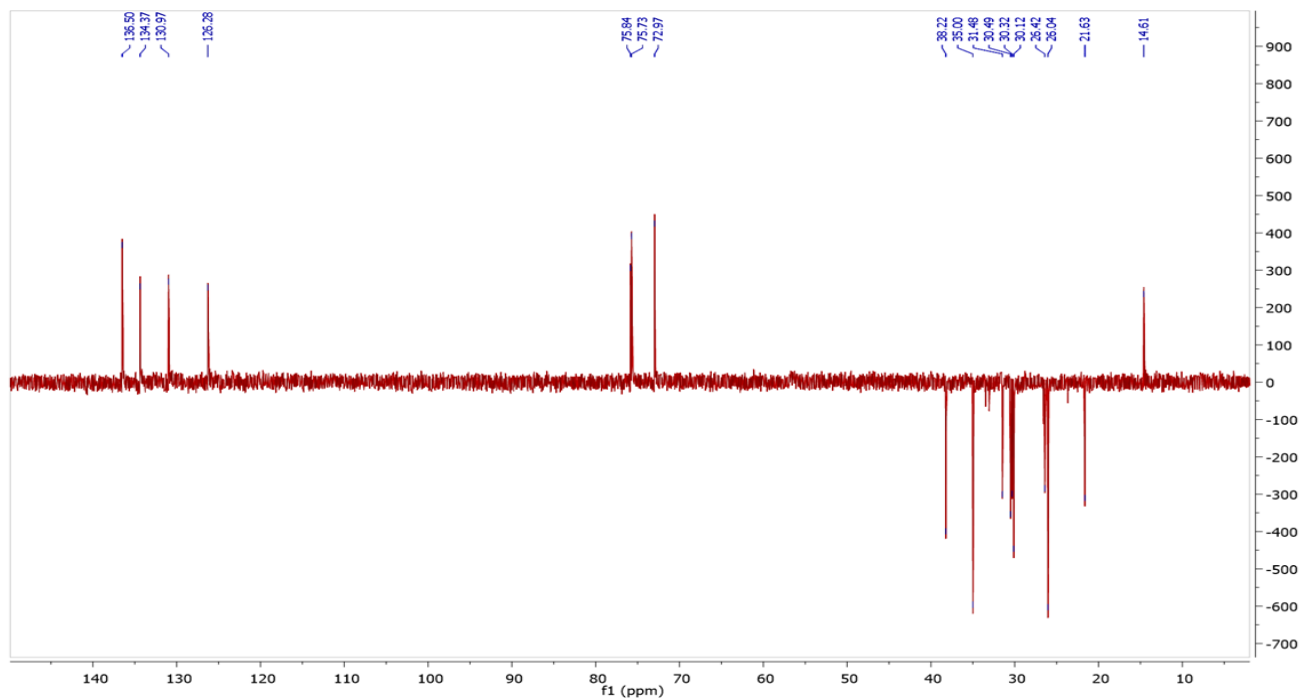

Figure S4. DEPT  $^{13}\text{C}$  NMR spectrum of compound (4) (125 MHz,  $\text{CD}_3\text{OD}$ )

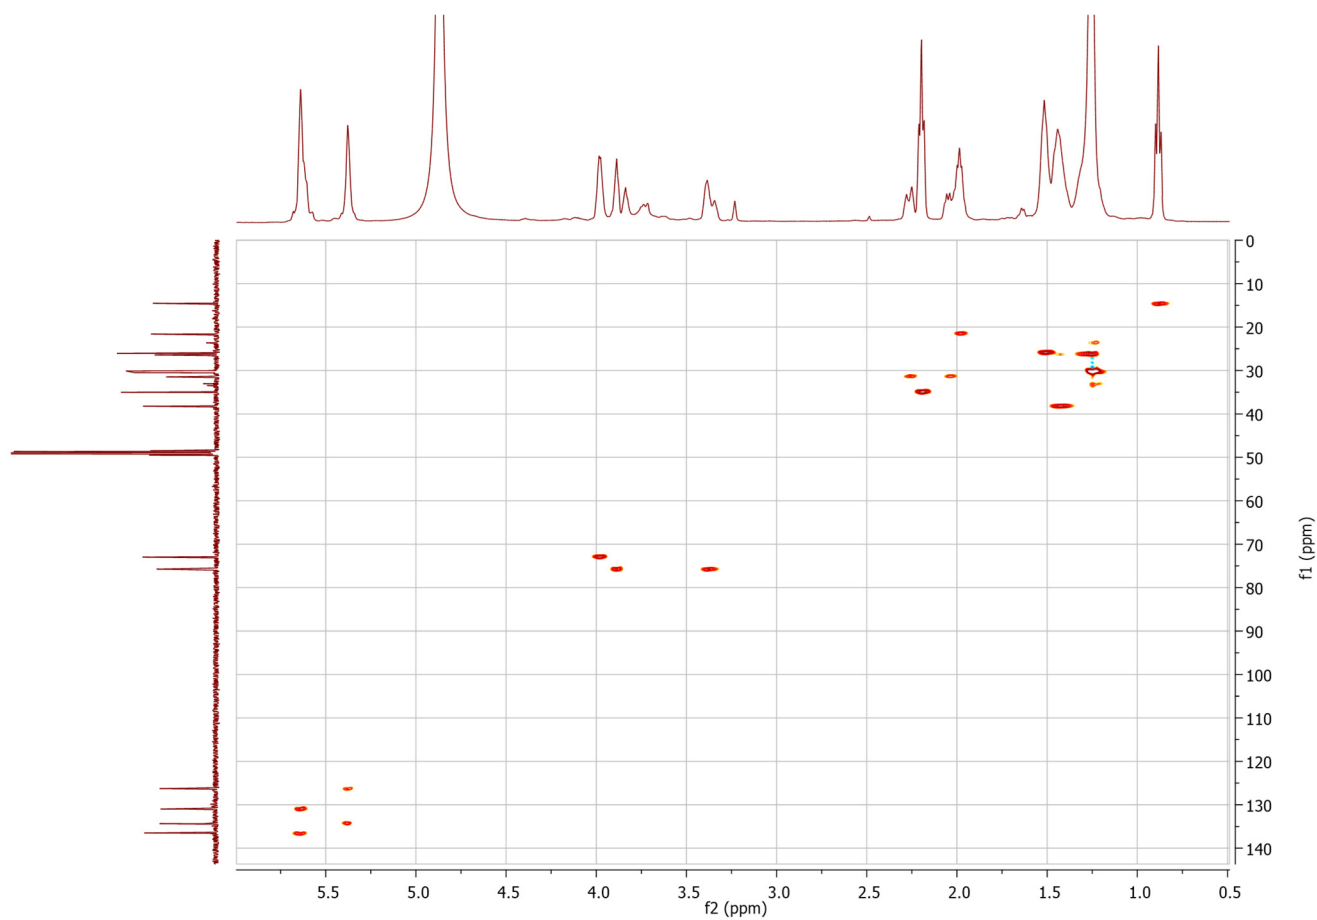

Figure S5.  $^1\text{H}$ - $^{13}\text{C}$  HSQC spectrum of compound (4) (500 MHz,  $\text{CD}_3\text{OD}$ )

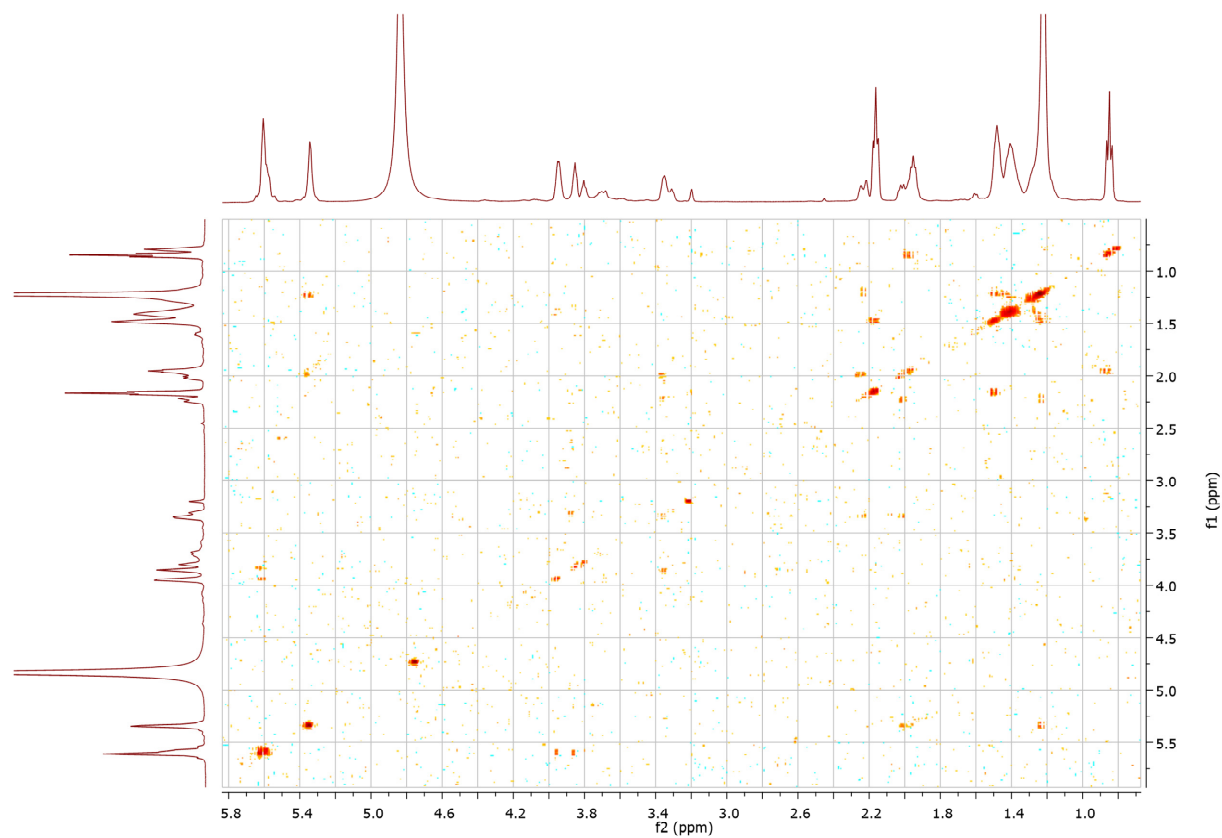

**Figure S6.**  $^1\text{H}$ - $^1\text{H}$  COSY spectrum of compound (**4**) (500 MHz,  $\text{CD}_3\text{OD}$ )

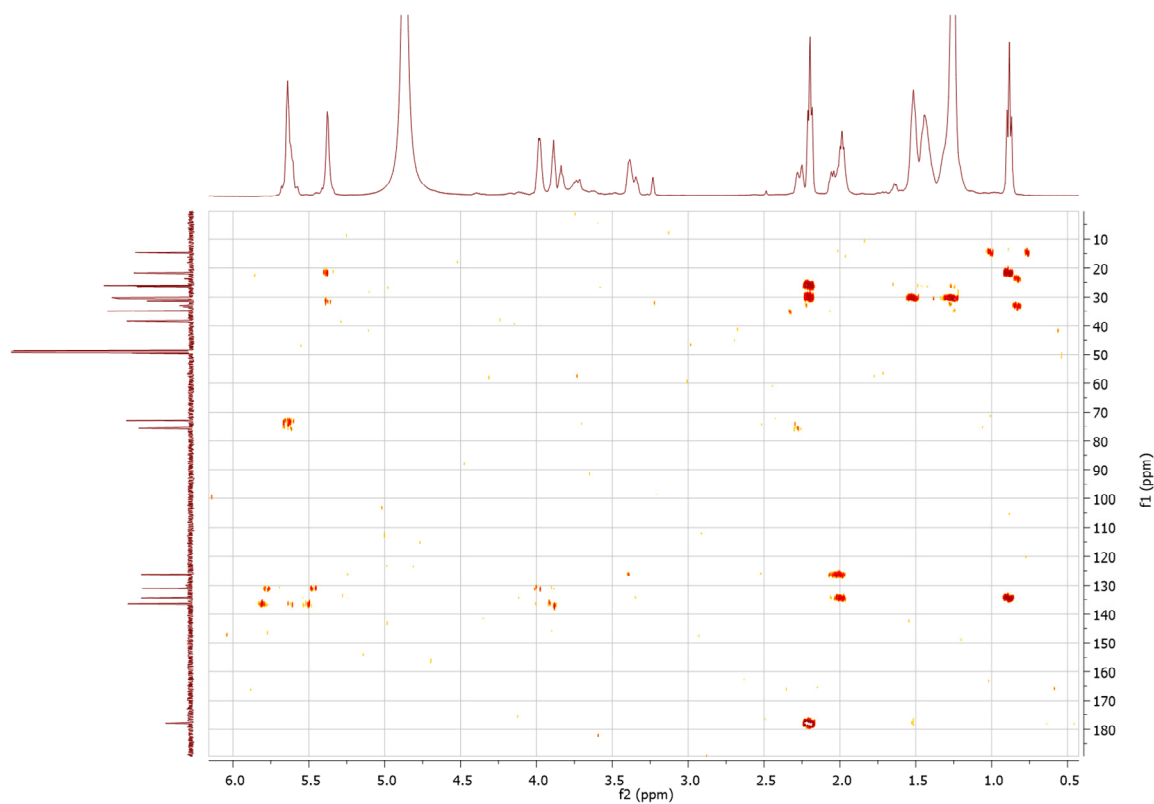

**Figure S7.**  $^1\text{H}$ - $^{13}\text{C}$  HMBC spectrum of compound (**4**) (500 MHz,  $\text{CD}_3\text{OD}$ )

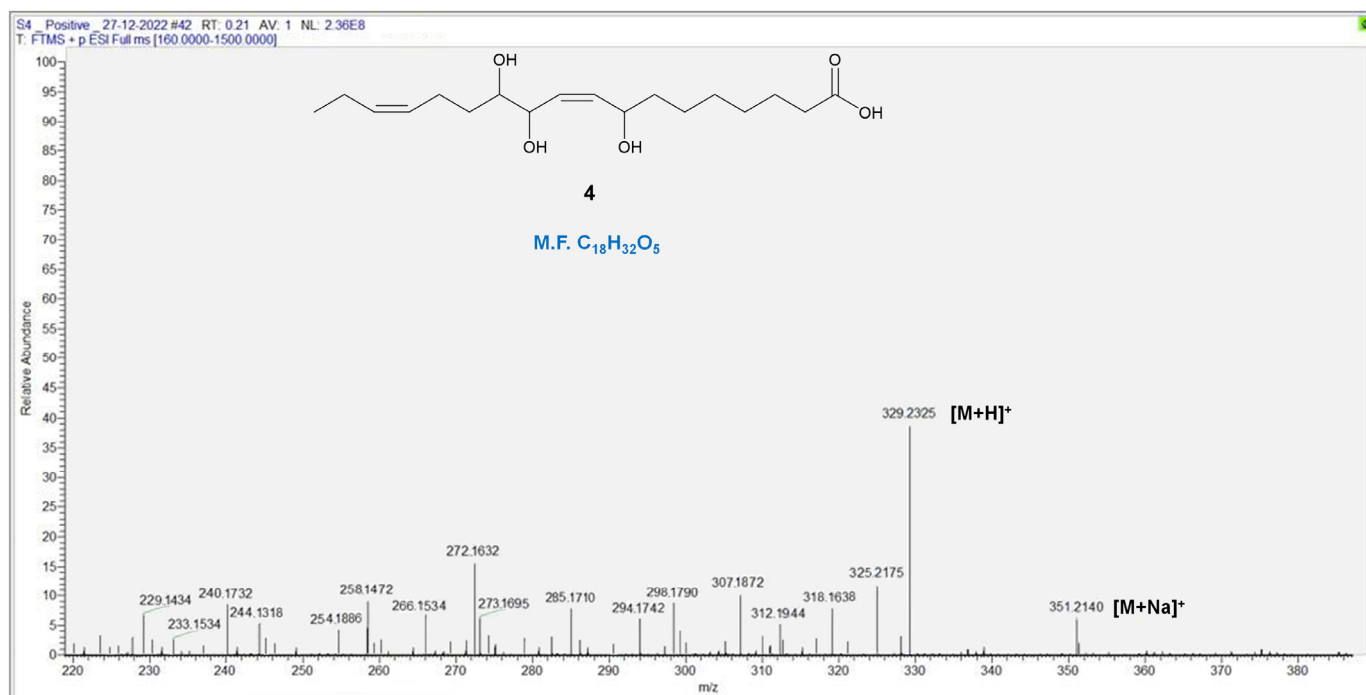

**A**

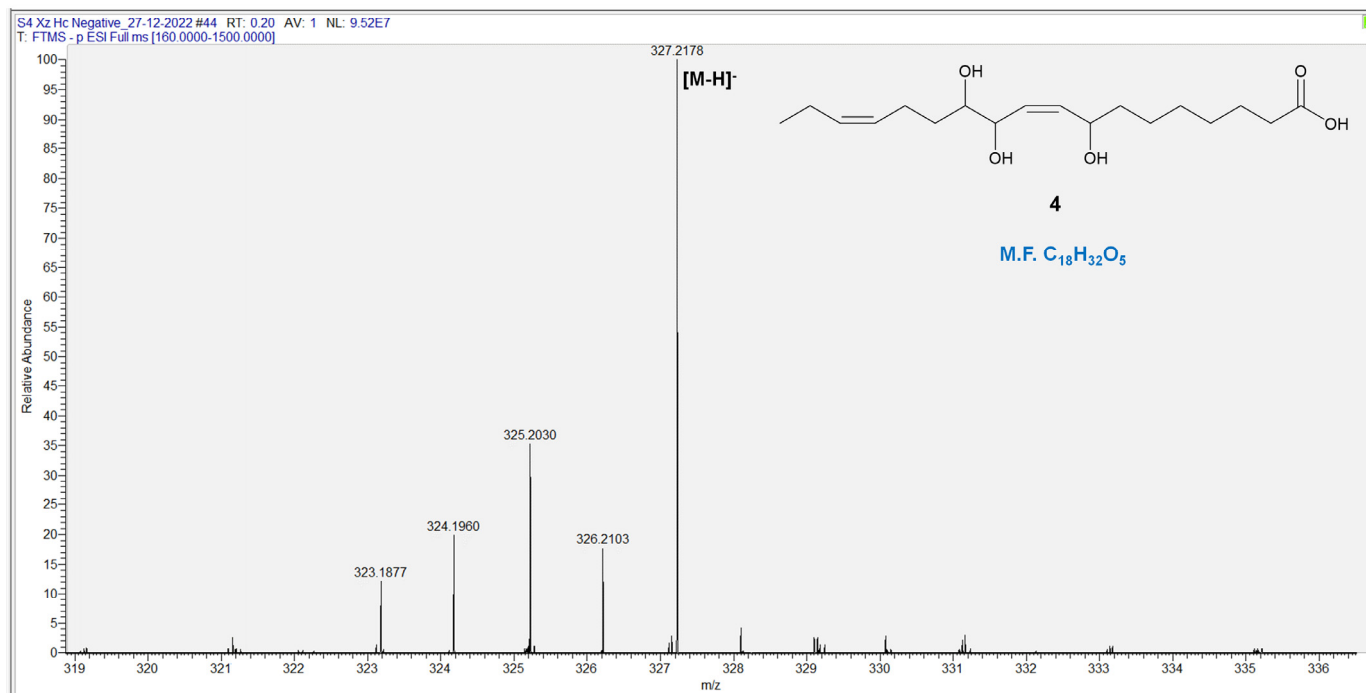

**B**

**Figure S8. A) Positive Mode, B) Negative mode HRESIMS of compound (4).**

**Table S1.**  $^1\text{H}$  (500 MHz) and  $^{13}\text{C}$  (125 MHz) NMR data of compounds **1**, **2** and **3**.

| No.       | <b>1</b> <sup>a</sup>   |                     | <b>2</b> <sup>a</sup>    |                     | <b>3</b> <sup>b</sup>   |                     |
|-----------|-------------------------|---------------------|--------------------------|---------------------|-------------------------|---------------------|
|           | $\delta_{\text{H}}$     | $\delta_{\text{C}}$ | $\delta_{\text{H}}$      | $\delta_{\text{C}}$ | $\delta_{\text{H}}$     | $\delta_{\text{C}}$ |
| <b>1</b>  | -                       | 180.0               | -                        | 179.9               | -                       | 177.7               |
| <b>2</b>  | 2.36, t (7.5 Hz)        | 34.1                | 2.33, <i>t</i> (7.6 Hz)  | 34.1                | 2.26, t (7.5 Hz)        | 34.9                |
| <b>3</b>  | 1.66, <i>m</i>          | 24.7                | 1.61, <i>m</i>           | 24.7                | 1.58, brt (7.0 Hz)      | 26.0                |
| <b>4</b>  | 1.32-1.41, <i>m</i>     | 28.8                | 1.35-1.37, <i>m</i>      | 29.0                | 1.34, <i>m</i>          | 30.1                |
| <b>5</b>  | 1.32-1.41, <i>m</i>     | 29.4                | 1.35-1.37, <i>m</i>      | 29.1                | 1.34, <i>m</i>          | 30.5                |
| <b>6</b>  | 2.08, <i>m</i>          | 27.1                | 1.35-1.37, <i>m</i>      | 29.2                | 1.34, <i>m</i>          | 26.4                |
| <b>7</b>  | 5.39, <i>m</i>          | 130.0               | 1.35-1.37, <i>m</i>      | 29.6                | 1.51, <i>m</i>          | 38.2                |
| <b>8</b>  | 5.35, <i>m</i>          | 127.2               | 2.04-2.08, <i>m</i>      | 27.2                | 4.04, dd (12.1, 6.3 Hz) | 73.0                |
| <b>9</b>  | 2.82, <i>m</i>          | 25.7                | 2.31-5.40, <i>m</i>      | 130.2               | 5.58, dd (9.3, 5.6 Hz)  | 136.5               |
| <b>10</b> | 5.37, <i>m</i>          | 128.3               | 5.31-5.40, <i>m</i>      | 127.8               | 5.58, dd (9.3, 5.6 Hz)  | 130.9               |
| <b>11</b> | 5.38, <i>m</i>          | 128.5               | 2.78, <i>m</i>           | 25.6                | 3.91, t (5.8 Hz)        | 76.5                |
| <b>12</b> | 2.82, <i>m</i>          | 25.7                | 5.31-5.40, <i>m</i>      | 128.21              | 3.41, <i>m</i>          | 75.7                |
| <b>13</b> | 5.37, <i>m</i>          | 128.1               | 5.31-5.40, <i>m</i>      | 128.24              | 1.49, <i>m</i>          | 33.0                |
| <b>14</b> | 5.40, <i>m</i>          | 132.1               | 2.78, <i>m</i>           | 25.5                | 1.34, <i>m</i>          | 26.5                |
| <b>15</b> | 2.09, <i>m</i>          | 20.7                | 5.31-5.40, <i>m</i>      | 127.1               | 1.34, <i>m</i>          | 30.3                |
| <b>16</b> | 0.99, <i>t</i> (7.6 Hz) | 14.4                | 5.31-5.40, <i>m</i>      | 131.9               | 1.34, <i>m</i>          | 33.5                |
| <b>17</b> | -                       | -                   | 2.04-2.08, <i>m</i>      | 20.5                | 1.34, <i>m</i>          | 23.7                |
| <b>18</b> | -                       | -                   | 0.95 <i>t</i> , (7.6 Hz) | 14.3                | 0.89, t (6.9 Hz)        | 14.5                |

<sup>a</sup> in  $\text{CDCl}_3$ , <sup>b</sup> in  $\text{CD}_3\text{OD}$

**Table S2.** <sup>1</sup>H (500 MHz) and <sup>13</sup>C (125 MHz) NMR data of compounds (**5-8**).

| No.                      | <b>5</b> <sup>a</sup> |                | <b>6</b> <sup>a</sup> |                | <b>7</b> <sup>a</sup> |                | <b>8</b> <sup>b</sup>                              |                |
|--------------------------|-----------------------|----------------|-----------------------|----------------|-----------------------|----------------|----------------------------------------------------|----------------|
|                          | δ <sub>H</sub>        | δ <sub>C</sub> | δ <sub>H</sub>        | δ <sub>C</sub> | δ <sub>H</sub>        | δ <sub>C</sub> | δ <sub>H</sub>                                     | δ <sub>C</sub> |
| <b>1</b>                 | 8.27, br s            | -              | -                     | -              | -                     | -              | 11.00, s                                           | -              |
| <b>2</b>                 | 7.26, br s            | 122.9          | 7.26, s               | 122.3          | 8.05, s               | 129.6          | 7.23, s                                            | 124.2          |
| <b>3</b>                 | -                     | 104.8          | -                     | 100.3          | -                     | 102.9          | -                                                  | 109.6          |
| <b>4</b>                 | 7.63, br d (5.1 Hz)   | 118.2          | 7.58, d (8.0 Hz)      | 118.3          | 8.20, d (7.8 Hz)      | 122.0          | 7.56, d (7.6 Hz)                                   | 118.4          |
| <b>5</b>                 | 7.23, m               | 120.4          | 7.20, t (7.8 Hz)      | 120.3          | 7.28, m               | 122.9          | 7.22, t (7.8 Hz)                                   | 118.3          |
| <b>6</b>                 | 7.30, m               | 123.0          | 7.33, t (7.6 Hz)      | 123.1          | 7.32, m               | 123.8          | 7.34, t (7.8 Hz)                                   | 120.9          |
| <b>7</b>                 | 7.44, br d (5.3 Hz)   | 111.7          | 7.48, d (8.3 Hz)      | 108.5          | 7.47, d (8.0 Hz)      | 123.8          | 7.46, d (7.8 Hz)                                   | 111.4          |
| <b>8</b>                 | -                     | 136.4          | -                     | 132.2          | -                     | 132.3          | -                                                  | 136.4          |
| <b>9</b>                 | -                     | 126.1          | -                     | 122.3          | -                     | 123.2          | -                                                  | 127.3          |
| <b>10</b>                | 3.88, s               | 14.5           | 3.76, d (1.0 Hz)      | 13.4           | -                     | 169.8          | 2.97, dd (15.0, 8.9 Hz)<br>3.33, dd (15.0, 3.0 Hz) | 27.1           |
| <b>11</b>                | -                     | 118.3          | -                     | 118.0          | -                     | -              | 3.47, q                                            | 54.8           |
| <b>12</b>                | -                     | -              | -                     | -              | -                     | -              | -                                                  | 170.4          |
| <b>1-OCH<sub>3</sub></b> | -                     | -              | 4.06, s               | 65.9           | 4.16, s               | 66.9           | -                                                  | -              |

<sup>a</sup> in CDCl<sub>3</sub>, <sup>b</sup> in DMSO-d<sub>6</sub>



**Table S3.** Binding parameters for the interaction of *S. irio* compounds (**1-4**) with PPAR- $\gamma$ .

| Compounds                      | Interacting residues                                                                                                                                                                                                                                                                                                                                                                                                                                                                                                                        | Type of interaction                                                                                                                                                                                                                                                                                                                                                                                                  | Bond length (Å)                                                                                                                                              | Binding affinity ( $K_b$ , $M^{-1}$ ) | Binding energy ( $\Delta G$ , kcal mol $^{-1}$ ) |
|--------------------------------|---------------------------------------------------------------------------------------------------------------------------------------------------------------------------------------------------------------------------------------------------------------------------------------------------------------------------------------------------------------------------------------------------------------------------------------------------------------------------------------------------------------------------------------------|----------------------------------------------------------------------------------------------------------------------------------------------------------------------------------------------------------------------------------------------------------------------------------------------------------------------------------------------------------------------------------------------------------------------|--------------------------------------------------------------------------------------------------------------------------------------------------------------|---------------------------------------|--------------------------------------------------|
| <b>Rivoglitazone (Control)</b> | TYR <sup>473</sup> :OH - LIG:O07<br>CYS <sup>285</sup> :SG - LIG<br>SER <sup>289</sup> :OG - LIG<br>ILE <sup>341</sup> :CG2 - LIG<br>ILE <sup>341</sup> :CG2 - LIG<br>MET <sup>348</sup> :SD - LIG<br>MET <sup>348</sup> :SD - LIG<br>MET <sup>364</sup> :SD - LIG<br>HIS <sup>449</sup> - LIG<br>GLY <sup>284</sup> :C,O;CYS285:N - LIG<br>GLY <sup>284</sup> :C,O;CYS285:N - LIG<br>CYS <sup>285</sup> :C,O;GLN286:N - LIG<br>LIG - CYS <sup>285</sup><br>LIG - LEU <sup>330</sup><br>LIG - CYS <sup>285</sup><br>LIG - CYS <sup>28</sup> | Hydrogen Bond<br>Hydrogen Bond (Pi-Donor; Pi-S)<br>Hydrogen Bond (Pi-Donor)<br>Hydrophobic (Pi-Sigma)<br>Hydrophobic (Pi-Sigma)<br>Pi-Sulfur<br>Pi-Sulfur<br>Pi-Sulfur<br>Hydrophobic (Pi-Pi T-shaped)<br>Hydrophobic (Amide-Pi Stacked)<br>Hydrophobic (Amide-Pi Stacked)<br>Hydrophobic (Amide-Pi Stacked)<br>Hydrophobic (Pi-Alkyl)<br>Hydrophobic (Pi-Alkyl)<br>Hydrophobic (Pi-Alkyl)<br>Hydrophobic (Pi-Alkyl) | 2.9378<br>3.6087<br>3.6789<br>3.4965<br>3.8057<br>5.8190<br>5.4093<br>4.9310<br>4.5987<br>4.8341<br>4.3730<br>4.5366<br>4.2320<br>4.9590<br>4.9173<br>5.2276 | $1.03 \times 10^6$                    | -8.2                                             |
| <b>Compound 1</b>              | LIG:H - HIS <sup>449</sup> :NE2<br>ALA <sup>292</sup> - LIG:C<br>LIG:C - MET <sup>329</sup><br>LIG:C - ILE <sup>296</sup><br>PHE <sup>226</sup> - LIG:C                                                                                                                                                                                                                                                                                                                                                                                     | Hydrogen Bond<br>Hydrophobic (Alkyl)<br>Hydrophobic (Alkyl)<br>Hydrophobic (Alkyl)<br>Hydrophobic (Alkyl)                                                                                                                                                                                                                                                                                                            | 2.4867<br>3.4493<br>4.0086<br>5.1961<br>5.1188                                                                                                               | $8.21 \times 10^4$                    | -6.7                                             |
| <b>Compound 2</b>              | LIG:H - HIS <sup>449</sup> :NE2<br>LIG:C - MET <sup>329</sup><br>LIG:C - LEU <sup>333</sup>                                                                                                                                                                                                                                                                                                                                                                                                                                                 | Hydrogen Bond<br>Hydrophobic (Alkyl)<br>Hydrophobic (Alkyl)                                                                                                                                                                                                                                                                                                                                                          | 2.1468<br>4.0600<br>4.0381                                                                                                                                   | $2.52 \times 10^4$                    | -6.0                                             |
| <b>Compound 3</b>              | ARG <sup>288</sup> :HH21 - LIG:O<br>LIG:H - MET <sup>329</sup> :O<br>LIG:H - CYS <sup>285</sup> :O<br>LIG:H - CYS <sup>285</sup> :O<br>LIG:H - SER <sup>289</sup> :OG<br>LIG:C - ILE <sup>281</sup><br>LIG:C - CYS <sup>285</sup><br>PHE <sup>282</sup> - LIG:C                                                                                                                                                                                                                                                                             | Hydrogen Bond<br>Hydrogen Bond<br>Hydrogen Bond<br>Hydrogen Bond<br>Hydrogen Bond<br>Hydrophobic (Alkyl)<br>Hydrophobic (Alkyl)<br>Hydrophobic (Pi-Alkyl)                                                                                                                                                                                                                                                            | 2.4563<br>2.1401<br>2.4391<br>2.7598<br>1.9331<br>4.9626<br>4.2712<br>5.0299                                                                                 | $2.68 \times 10^5$                    | -7.4                                             |
| <b>Compound 4</b>              | LIG:H - CYS <sup>285</sup> :O<br>LIG:H - SER <sup>289</sup> :OG<br>LIG:C - PHE <sup>282</sup><br>ALA <sup>292</sup> - LIG:C<br>LIG:C - ILE <sup>326</sup><br>LIG:C - MET <sup>329</sup>                                                                                                                                                                                                                                                                                                                                                     | Hydrogen Bond<br>Hydrogen Bond<br>Hydrophobic (Pi-Sigma)<br>Hydrophobic (Alkyl)<br>Hydrophobic (Alkyl)<br>Hydrophobic (Alkyl)                                                                                                                                                                                                                                                                                        | 2.2347<br>2.2557<br>3.7546<br>4.0911<br>4.3909<br>4.3335                                                                                                     | $2.98 \times 10^4$                    | -6.1                                             |

**Table S4.** Binding parameters for the interaction of SI compounds (**5-8**) with 5-HT<sub>1A</sub> Serotonin receptor.

| Compounds                  | Interacting residues                                                                                                                              | Type of interaction                                                                                                                                                            | Bond length (Å)                                                              | Binding affinity ( $K_b$ , M <sup>-1</sup> ) | Binding energy ( $\Delta G$ , kcal mol <sup>-1</sup> ) |
|----------------------------|---------------------------------------------------------------------------------------------------------------------------------------------------|--------------------------------------------------------------------------------------------------------------------------------------------------------------------------------|------------------------------------------------------------------------------|----------------------------------------------|--------------------------------------------------------|
| <b>Serotonin (Control)</b> | LIG:H - ASP116:OD2<br>LIG:H - TYR390:OH<br>LIG:H - VAL117:O<br>LIG:H - THR121:OG1<br>LIG - PHE361<br>LIG - VAL117<br>LIG - VAL117<br>LIG - ILE189 | Hydrogen Bond<br>Hydrogen Bond<br>Hydrogen Bond<br>Hydrogen Bond<br>Hydrophobic (Pi-Pi T-shaped)<br>Hydrophobic (Pi-Alkyl)<br>Hydrophobic (Pi-Alkyl)<br>Hydrophobic (Pi-Alkyl) | 2.1429<br>2.2678<br>2.6567<br>1.7918<br>5.4126<br>4.1815<br>4.8280<br>4.8306 | $2.98 \times 10^4$                           | -6.1                                                   |
| <b>Compound 5</b>          | ASP116:OD1 - LIG<br>CYS120:SG - LIG<br>CYS120:SG - LIG<br>PHE361 - LIG<br>LIG - PHE361                                                            | Electrostatic (Pi-Anion)<br>Hydrogen Bond; Pi-Sulfur<br>Hydrogen Bond<br>Hydrophobic (Pi-Pi Stacked)<br>Hydrophobic (Pi-Pi Stacked)                                            | 4.2645<br>3.6947<br>3.9737<br>3.8159<br>4.6029                               | $4.94 \times 10^4$                           | -6.4                                                   |
| <b>Compound 6</b>          | SER199:HG - LIG:N<br>VAL117:CG2 - LIG<br>PHE361 - LIG<br>LIG - VAL117<br>LIG - CYS120<br>LIG - ILE189                                             | Hydrogen Bond<br>Hydrophobic (Pi-Sigma)<br>Hydrophobic (Pi-Pi T-shaped)<br>Hydrophobic (Pi-Alkyl)<br>Hydrophobic (Pi-Alkyl)<br>Hydrophobic (Pi-Alkyl)                          | 2.9146<br>3.9579<br>5.4102<br>4.6753<br>5.4746<br>5.1247                     | $4.94 \times 10^4$                           | -6.4                                                   |
| <b>Compound 7</b>          | VAL117:CG1 - LIG<br>VAL117:CG2 - LIG<br>CYS120:SG - LIG<br>LIG - ILE189<br>PHE361 - LIG                                                           | Hydrophobic (Pi-Sigma)<br>Hydrophobic (Pi-Sigma)<br>Pi-Sulfur<br>Hydrophobic (Pi-Alkyl)<br>Hydrophobic (Pi-Pi T-Shaped)                                                        | 3.8512<br>3.5275<br>5.4857<br>5.1373<br>5.6271                               | $5.85 \times 10^4$                           | -6.5                                                   |
| <b>Compound 8</b>          | LIG:H - THR196:OG1<br>LIG - ILE189<br>LIG - ILE189<br>LIG - LYS191<br>LIG - ALA365<br>LIG - ALA365<br>LIG - PRO369                                | Hydrogen Bond<br>Hydrophobic (Pi-Alkyl)<br>Hydrophobic (Pi-Alkyl)<br>Hydrophobic (Pi-Alkyl)<br>Hydrophobic (Pi-Alkyl)<br>Hydrophobic (Pi-Alkyl)<br>Hydrophobic (Pi-Alkyl)      | 2.0887<br>5.2779<br>5.0783<br>5.0050<br>4.0099<br>4.9989<br>5.2075           | $1.15 \times 10^5$                           | -6.9                                                   |

**Table S5.** Binding parameters for the interaction of *S. irio* compounds (**5-8**) with 5-HT<sub>2A</sub> serotonin receptor.

| Compounds                    | Interacting residues                                                                                                                                                                                                                                               | Type of interaction                                                                                                                                                                                                                                                                                                                                                          | Bond length (Å)                                                                                                                                    | Binding affinity ( $K_b$ , M <sup>-1</sup> ) | Binding energy ( $\Delta G$ , kcal mol <sup>-1</sup> ) |
|------------------------------|--------------------------------------------------------------------------------------------------------------------------------------------------------------------------------------------------------------------------------------------------------------------|------------------------------------------------------------------------------------------------------------------------------------------------------------------------------------------------------------------------------------------------------------------------------------------------------------------------------------------------------------------------------|----------------------------------------------------------------------------------------------------------------------------------------------------|----------------------------------------------|--------------------------------------------------------|
| <b>Resperidone (Control)</b> | SER131:HG - LIG:O<br>SER159:HG - LIG:O<br>ASN363:OD1 - LIG:F<br>VAL366:CG1 - LIG<br>LIG:C - TRP336<br>PHE340 - LIG<br>VAL366 - LIG<br>LIG - ILE163<br>PHE243 - LIG<br>PHE332 - LIG<br>TRP336 - LIG<br>PHE339 - LIG<br>PHE340 - LIG<br>LIG - VAL156<br>LIG - VAL366 | Hydrogen Bond<br>Hydrogen Bond<br>Halogen (Fluorine)<br>Hydrophobic (Pi-Sigma)<br>Hydrophobic (Pi-Sigma)<br>Hydrophobic (Pi-Pi T-shaped)<br>Hydrophobic (Alkyl)<br>Hydrophobic (Alkyl)<br>Hydrophobic (Pi-Alkyl)<br>Hydrophobic (Pi-Alkyl)<br>Hydrophobic (Pi-Alkyl)<br>Hydrophobic (Pi-Alkyl)<br>Hydrophobic (Pi-Alkyl)<br>Hydrophobic (Pi-Alkyl)<br>Hydrophobic (Pi-Alkyl) | 2.6074<br>2.4294<br>3.1479<br>3.6065<br>3.9469<br>4.7850<br>4.5414<br>4.9503<br>5.2906<br>5.0258<br>3.9891<br>4.7884<br>4.9599<br>5.2296<br>4.3423 | $4.52 \times 10^8$                           | -11.8                                                  |
| <b>Compound 5</b>            | SER242:CB - LIG:O<br>TRP336 - LIG<br>TRP336 - LIG<br>PHE340 - LIG<br>LIG - PHE340<br>SER159:C,O;THR160:N - LIG<br>SER159:C,O;THR160:N - LIG<br>LIG - VAL156<br>LIG - ILE163                                                                                        | Hydrogen Bond<br>Hydrophobic (Pi-Pi T-shaped)<br>Hydrophobic (Pi-Pi T-shaped)<br>Hydrophobic (Pi-Pi T-shaped)<br>Hydrophobic (Pi-Pi T-shaped)<br>Hydrophobic (Amide-Pi Stacked)<br>Hydrophobic (Amide-Pi Stacked)<br>Pi-Alkyl<br>Pi-Alkyl                                                                                                                                    | 3.2287<br>4.8511<br>5.2185<br>4.7955<br>4.9036<br>5.0640<br>4.2381<br>5.2206<br>5.4933                                                             | $3.17 \times 10^5$                           | -7.5                                                   |
| <b>Compound 6</b>            | LIG:H - ASP155:OD1<br>LIG:H - ASP155:OD1<br>TRP336 - LIG<br>TRP336 - LIG<br>PHE340 - LIG<br>LIG - PHE340<br>SER159:C,O;THR160:N - LIG<br>SER159:C,O;THR160:N - LIG<br>LIG - VAL156                                                                                 | Hydrogen Bond<br>Hydrogen Bond<br>Hydrophobic (Pi-Pi T-shaped)<br>Hydrophobic (Pi-Pi T-shaped)<br>Hydrophobic (Pi-Pi T-shaped)<br>Hydrophobic (Pi-Pi T-shaped)<br>Hydrophobic (Pi-Pi T-shaped)<br>Hydrophobic (Amide-Pi Stacked)<br>Hydrophobic (Amide-Pi Stacked)<br>Hydrophobic (Pi-Alkyl)                                                                                 | 2.7722<br>2.9163<br>4.8407<br>5.1446<br>4.6742<br>5.0964<br>4.3727<br>5.0037<br>5.0507                                                             | $2.68 \times 10^5$                           | -7.4                                                   |
| <b>Compound 7</b>            | SER159:HG - LIG:N<br>LIG:H - THR160:OG1<br>TRP336 - LIG<br>TRP336 - LIG<br>PHE340 - LIG<br>LIG - PHE340<br>LIG - VAL156<br>LIG - ILE163                                                                                                                            | Hydrogen Bond<br>Hydrogen Bond<br>Hydrophobic (Pi-Pi T-shaped)<br>Hydrophobic (Pi-Pi T-shaped)<br>Hydrophobic (Pi-Pi T-shaped)<br>Hydrophobic (Pi-Pi T-shaped)<br>Hydrophobic (Pi-Alkyl)<br>Hydrophobic (Pi-Alkyl)                                                                                                                                                           | 2.2083<br>2.3250<br>4.8647<br>5.3392<br>4.9159<br>5.1237<br>5.1553<br>5.2300                                                                       | $2.60 \times 10^5$                           | -7.3                                                   |
| <b>Compound 8</b>            | LIG:H - ASP155:OD1<br>LIG:H - THR160:OG1<br>LIG:H - TYR370:OH<br>LIG:H - ASP155:OD1<br>LIG:H - ASP155:O<br>TRP336 - LIG<br>TRP336 - LIG<br>PHE340 - LIG<br>LIG - PHE340<br>LIG - VAL156<br>LIG - ILE163                                                            | Hydrogen Bond; Electrostatic<br>Hydrogen Bond<br>Hydrogen Bond<br>Hydrogen Bond<br>Hydrogen Bond<br>Hydrophobic (Pi-Pi T-shaped)<br>Hydrophobic (Pi-Pi T-shaped)<br>Hydrophobic (Pi-Pi T-shaped)<br>Hydrophobic (Pi-Pi T-shaped)<br>Hydrophobic (Pi-Alkyl)<br>Hydrophobic (Pi-Alkyl)                                                                                         | 2.0674<br>2.5404<br>2.8946<br>3.0856<br>2.9126<br>4.8475<br>5.3792<br>4.9113<br>5.0152<br>5.3190<br>5.0990                                         | $2.68 \times 10^5$                           | -8.1                                                   |

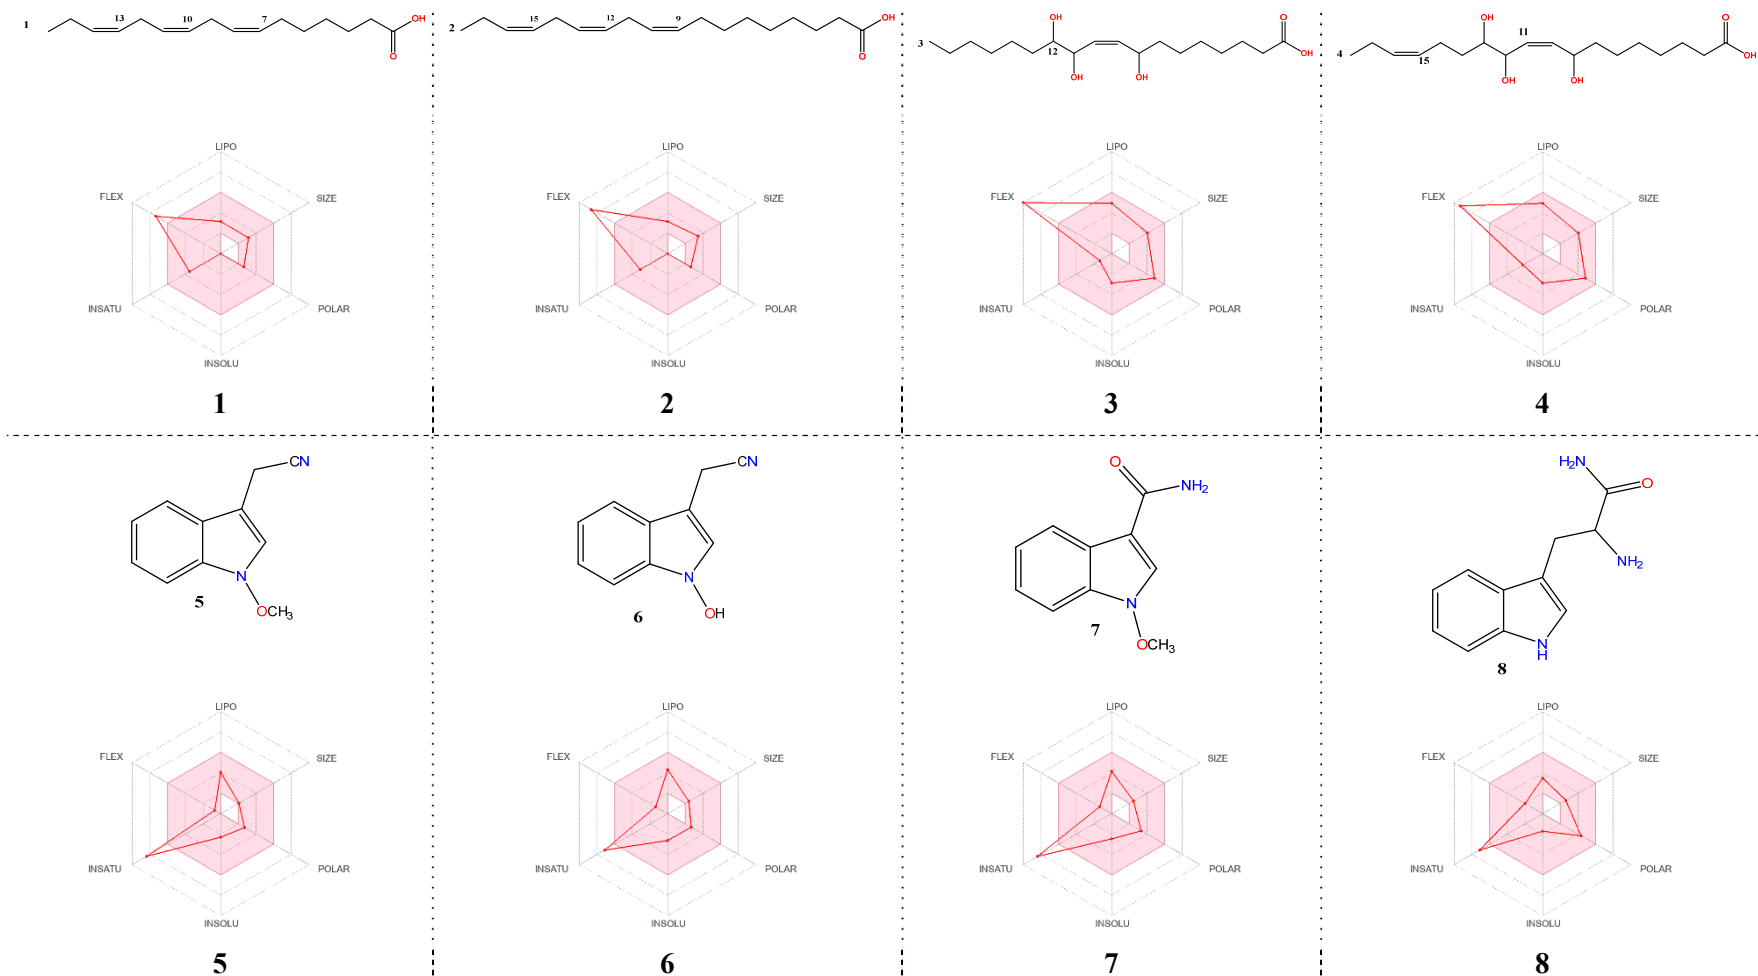

**Figure S9.** Bioavailability radar representations of the isolated compounds (1-8) from *Sisymbrium irio* L. The pink area represents the optimal range for oral bioavailability and the red line represents the optimal physicochemical properties for oral bioavailability properties.

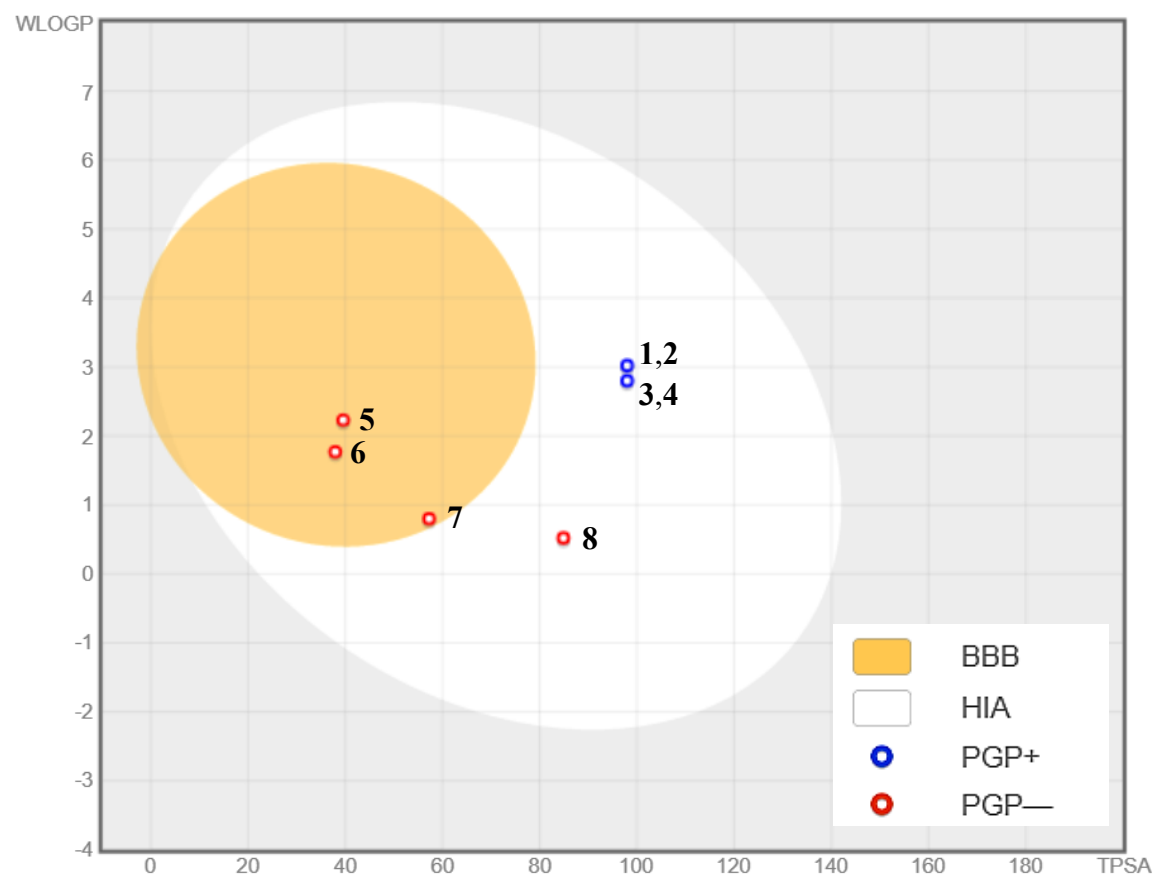

**Figure S10.** Boiled-egg graph of blood-brain barrier (BBB) permeability and human gastrointestinal absorption (HIA), blue circle; predicted active-efflux by P-gp, i.e., glycoprotein substrate (PGP<sup>+</sup>), and red circle; no predicted active-efflux by P-gp i.e., non-substrate (PGP<sup>-</sup>).

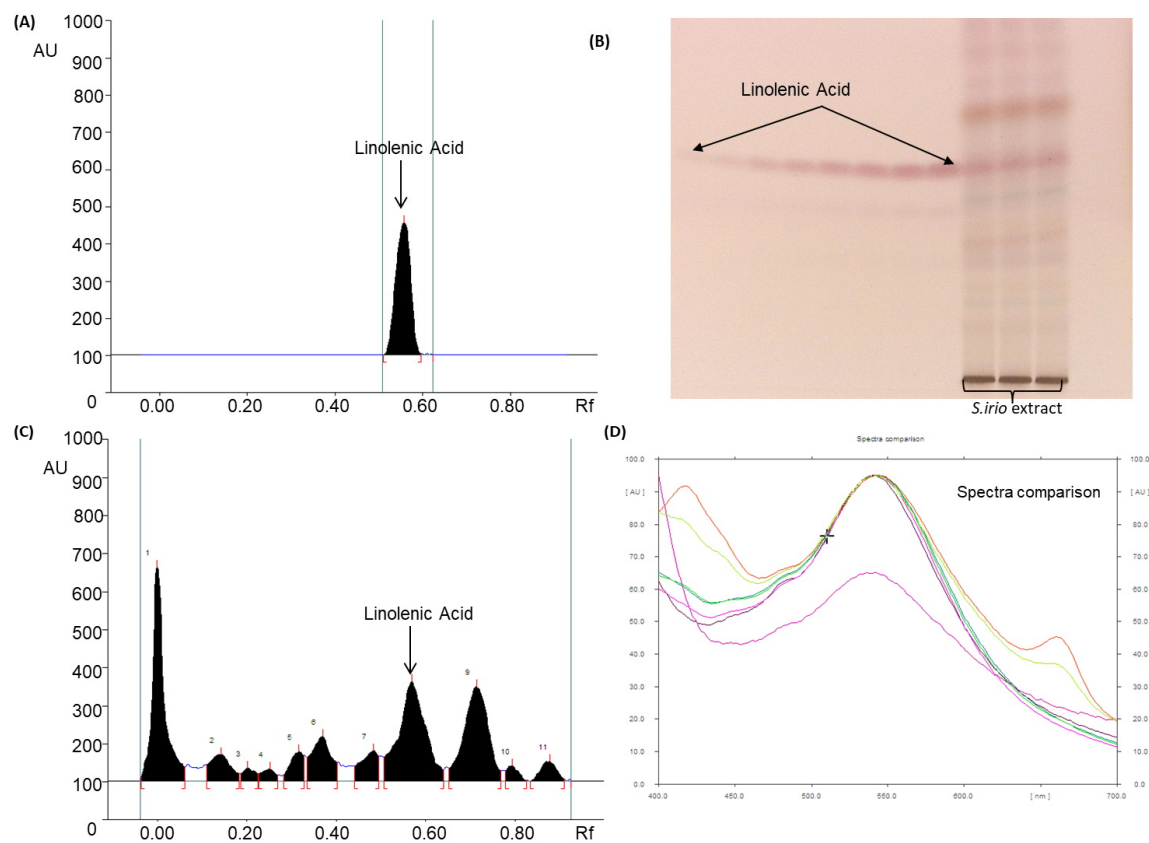

**Figure S11.** Chromatogram of HPTLC analysis of linolenic acid in hexane extract of *S. irio* (aerial parts) [mobile phase: acetone: n-hexane: acetic acid (25:75:0.1, v/v/v)]. (A) HPTLC chromatogram of standard linolenic acid ( $R_f = 0.57 \pm 0.004$ ) at  $\lambda_{\max} = 540$  nm; (B) Pictogram of derivatized TLC plate in day light; (C) HPTLC chromatogram of *S. irio* hexane extract (linoleic acid, spot 8,  $R_f = 0.57$ ); (D) Spectral comparison of all tracks at 540nm.
